# Supplementary material for: High-loading ultrastable CsPbBr3 perovskite quantum dots in hierarchical silicalite-1 by elimination of co-templates for multimodal optical applications
Source: Royal Society of Chemistry journal article supplement (doi:10.1039/d3tc01812a), 2023-01-01
Supplement: d3tc01812a1.pdf [file d3tc01812a1.pdf]

## Supplementary Information

### High-loading ultrastable CsPbBr<sub>3</sub> perovskite quantum dots in hierarchical Silicalite-1 by elimination of co-templates for multimodal optical applications

Xiandi Yu, Yuchi Zhang, Le Han, Yan Xu\*

*Department of Chemistry, College of Sciences, Northeastern University, Shenyang, Liaoning 110819, China*

#### Figure Captions

**Fig. S1.** SEM images of (a) CsPbBr<sub>3</sub>/Silicalite-1 (A-1), (b) CsPbBr<sub>3</sub>/Silicalite-1 (A-2), and (c) CsPbBr<sub>3</sub>/Silicalite-1 (A-3).

**Fig. S2.** (a) SEM, (b) TEM, (c,d) HRTEM images of CsPbBr<sub>3</sub>/Silicalite-1 (A-4) nanocomposite.

**Fig. S3.** SEM images of (a) CsPbBr<sub>3</sub>/Silicalite-1 (C-2-3), and (b) CsPbBr<sub>3</sub>/Silicalite-1 (B-2-3).

**Fig. S4.** PL intensity stability of (a) CsPbBr<sub>3</sub>/Silicalite-1 (B), and (b) CsPbBr<sub>3</sub>/Silicalite-1 (C) nanocomposite when exposed in air and water, respectively.

**Fig. S5.** PL intensity stability of CsPbBr<sub>3</sub>/Silicalite-1 (A-2-3) in solvent of DMSO, DMF, MeOH, EtOH, Acetone, and Hexane, respectively.

**Fig. S6.** Fingerprint stability of CsPbBr<sub>3</sub>/Silicalite-1 (A-2-3) composite when exposed in air (a-c) and water (d-f), respectively.

**Table S1** Comparison of BET surface areas and pore volumes of Silicalite-1, Silicalite-1 (A), and CsPbBr<sub>3</sub>/Silicalite-1 (A-2-3).

**Table S2** Comparison of temperature sensitivity of several CsPbBr<sub>3</sub>-based optical thermometers for temperature sensing application.

**Table S3** Comparison of Fe<sup>3+</sup> detection for various materials based on different methods.

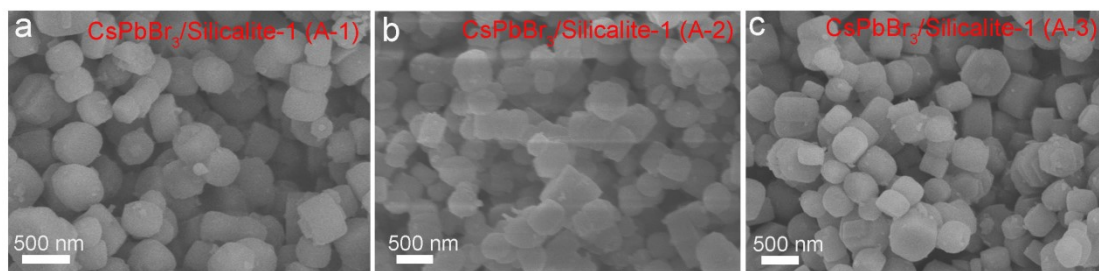

**Fig. S1.** SEM images of (a) CsPbBr<sub>3</sub>/Silicalite-1 (A-1), (b) CsPbBr<sub>3</sub>/Silicalite-1 (A-2), and (c) CsPbBr<sub>3</sub>/Silicalite-1 (A-3).

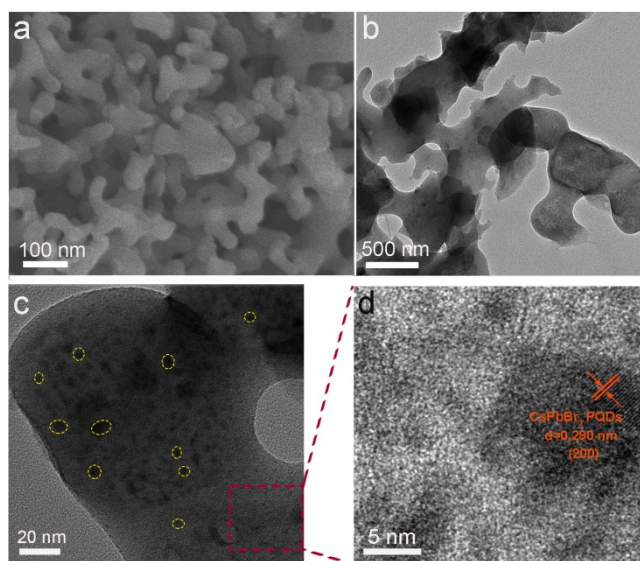

**Fig. S2.** (a) SEM, (b) TEM, (c,d) HRTEM images of CsPbBr<sub>3</sub>/Silicalite-1 (A-4) nanocomposite.

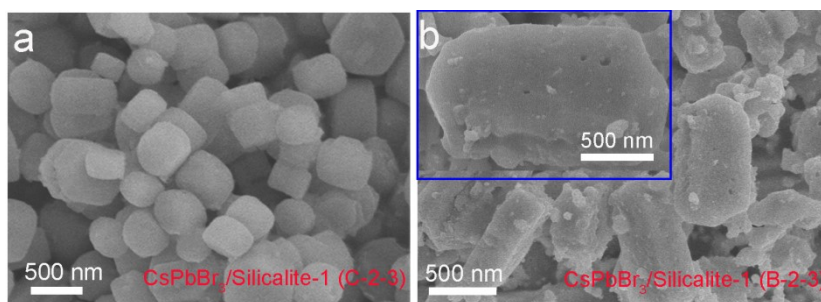

**Fig. S3.** SEM images of (a) CsPbBr<sub>3</sub>/Silicalite-1 (C-2-3), and (b) CsPbBr<sub>3</sub>/Silicalite-1 (B-2-3).

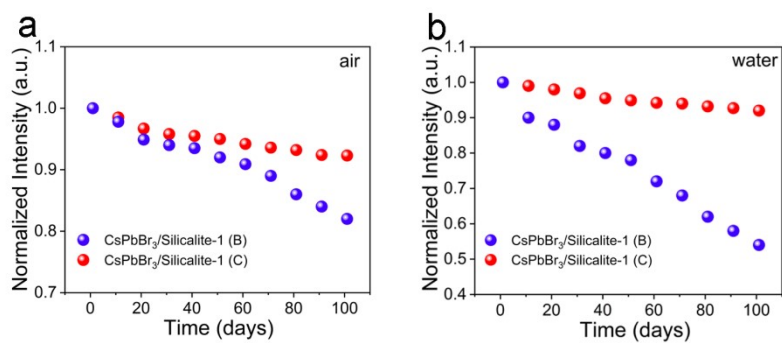

**Fig. S4.** PL intensity stability of (a) CsPbBr<sub>3</sub>/Silicalite-1 (B), and (b) CsPbBr<sub>3</sub>/Silicalite-1 (C) nanocomposite when exposed in air and water, respectively.

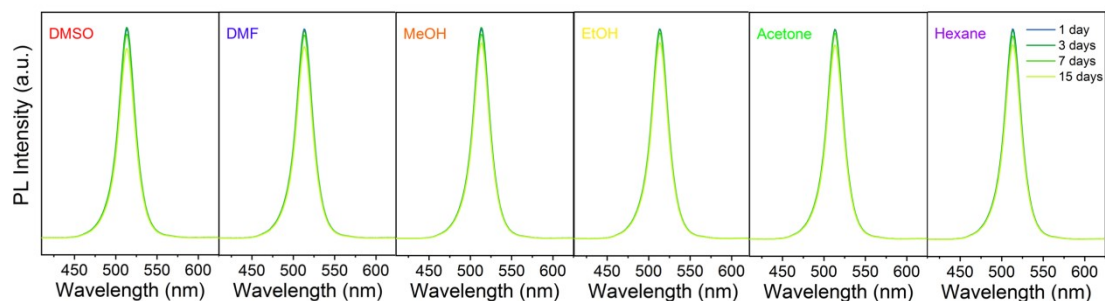

**Fig. S5.** PL intensity stability of CsPbBr<sub>3</sub>/Silicalite-1 (A-2-3) in solvent of DMSO, DMF, MeOH, EtOH, Acetone, and Hexane, respectively.

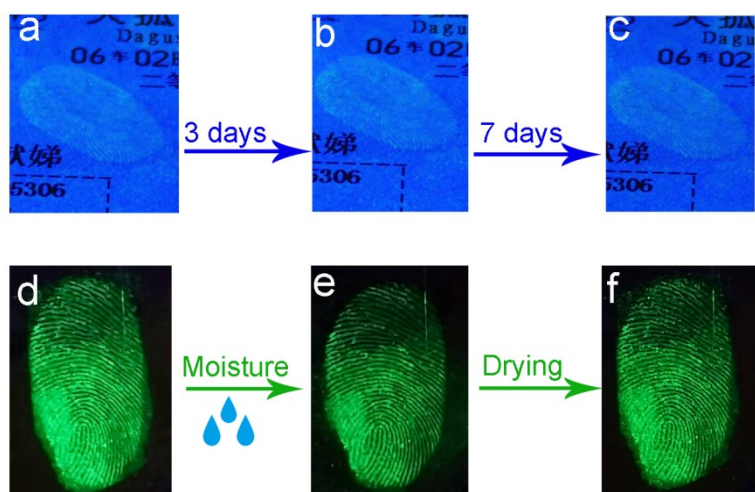

**Fig. S6.** Fingerprint stability of CsPbBr<sub>3</sub>/Silicalite-1 (A-2-3) composite when exposed in air (a-c) and water (d-f), respectively.

**Table S1** Comparison of BET surface areas and pore volumes of Silicalite-1, Silicalite-1 (A), and CsPbBr<sub>3</sub>/Silicalite-1 (A-2-3).

| Samples                                   | S <sub>BET</sub><br>(m <sup>2</sup> /g) | S <sub>ext</sub><br>(m <sup>2</sup> /g) | V <sub>total</sub><br>(cm <sup>3</sup> /g) | V <sub>meso</sub><br>(cm <sup>3</sup> /g) | V <sub>micro</sub><br>(cm <sup>3</sup> /g) |
|-------------------------------------------|-----------------------------------------|-----------------------------------------|--------------------------------------------|-------------------------------------------|--------------------------------------------|
| Silicalite-1                              | 428                                     | 63                                      | 0.267                                      | 0.093                                     | 0.174                                      |
| Silicalite-1 (A)                          | 249                                     | 275                                     | 0.68                                       | 0.69                                      | -0.02                                      |
| CsPbBr <sub>3</sub> /Silicalite-1 (A-2-3) | 565                                     | 378                                     | 0.958                                      | 0.877                                     | 0.08                                       |

**Table S2** Comparison of temperature sensitivity of several CsPbBr<sub>3</sub>-based optical thermometers for temperature sensing application.

| Materials                                                                            | Temp. range [°C] | Max. S <sub>r</sub> [% °C <sup>-1</sup> ] or nm °C <sup>-1</sup> | Ref.      |
|--------------------------------------------------------------------------------------|------------------|------------------------------------------------------------------|-----------|
| CsPbBr <sub>3</sub> /Silicalite-1 (A-2-3)                                            | 30-110           | 23 (110 °C)                                                      | This work |
| Tb <sup>3+</sup> :CsPbI <sub>3</sub>                                                 | (-193)-207       | 1.78 (107 °C)                                                    | [1]       |
| CsPbBr <sub>3</sub> -KSF-PS                                                          | 30-70            | 10.31 (45 °C)                                                    | [2]       |
| CsPbBr <sub>3</sub> /EuPO <sub>4</sub>                                               | 30-210           | 1.8 (150 °C)                                                     | [3]       |
| CsPbBr <sub>3</sub> /Eu <sup>3+</sup>                                                | 30-120           | 2.11 (120 °C)                                                    | [4]       |
| Dual-phase compounds of NaYF <sub>4</sub> : Ho <sup>3+</sup> and CsPbBr <sub>3</sub> | 20-160           | 5.13 (120 °C)                                                    | [5]       |
| Eu <sup>3+</sup> -doped CsPbBr <sub>3</sub> PQDs@glass                               | (-180)-110       | 2.25 (39 °C)                                                     | [6]       |
| CsPbBr <sub>3</sub> -TS-1                                                            | (-193)-107       | 7.14 (107 °C)                                                    | [7]       |
| CsPbBr <sub>3</sub> /Silicalite-1 (A-2-3)                                            | 30-110           | 0.079 nm °C <sup>-1</sup>                                        | This work |
| CsPbBr <sub>3</sub> -TS-1                                                            | (-193)-107       | 0.035 nm °C <sup>-1</sup>                                        | [7]       |
| CsPbBr <sub>3</sub> -HSZ ZSM-5                                                       | 10-100           | 0.073 nm °C <sup>-1</sup>                                        | [8]       |
| Dye <sub>0.001</sub> @Eu-MOF                                                         | 10-90            | 0.142 nm °C <sup>-1</sup>                                        | [9]       |

**Table S3** Comparison of Fe<sup>3+</sup> detection for various materials based on different methods.

| Material                                               | Detection methods               | Detection range (μM) | Detection limits (μM) | Ref.      |
|--------------------------------------------------------|---------------------------------|----------------------|-----------------------|-----------|
| Organic/inorganic hybrid titanium Oxide                | Potentiometric detection        | 1-10 <sup>4</sup>    | -                     | [10]      |
| C dots                                                 | Ratiometric fluorescent sensing | 5-50                 | 0.16                  | [11]      |
| ADTC functionalized Ag NPs                             | Colorimetric detection          | 2.49-69.8            | 6.18                  | [12]      |
| Hyperbranched polyimide                                | Fluorescent sensing             | 0-600                | 60.6                  | [13]      |
| Graphene quantum dots (GQDs)                           | Fluorescent sensing             | 3.5-670              | 1.6                   | [14]      |
| SiO <sub>2</sub> @CsPbX <sub>3</sub> @SiO <sub>2</sub> | Fluorescent sensing             | 10-70                | 3                     | [15]      |
| CsSnCl <sub>3</sub> NCs by Bone Gelatin                | Fluorescent sensing             | 0-2000               | 8                     | [16]      |
| CsPbBr <sub>3</sub> /Silicalite-1 (A-2-3)              | Fluorescent sensing             | 0.1-10 <sup>5</sup>  | 0.78×10 <sup>-3</sup> | This work |

---

## References

- [1] Y. Zhang, J. Liu, H. Zhang, Q. Ye, X. Liang, W. Xiang, Ultra-stable Tb<sup>3+</sup>: CsPbI<sub>3</sub> nanocrystal glasses for wide-range high-sensitivity optical temperature sensing. *J. Eur. Ceram. Soc.* 40 (2020) 6023-6030.
- [2] J. Jin, J. Lin, Y. Huang, L. Zhang, Y. Jiang, D. Tian, F. Lin, Y. Wang, X. Chen, High sensitivity ratiometric fluorescence temperature sensing using the microencapsulation of CsPbBr<sub>3</sub> and K<sub>2</sub>SiF<sub>6</sub>:Mn<sup>4+</sup> phosphor. *Chin. Chem. Lett.* 33 (2022) 4798-4802.
- [3] C. Wang, H. Lin, X. Xiang, Y. Cheng, Q. Huang, Y. Gao, X. Cui, Y. Wang, CsPbBr<sub>3</sub>/EuPO<sub>4</sub> dual-phase devitrified glass for highly sensitive self-calibrating optical thermometry. *J. Mater. Chem. C* 6 (2018) 9964-9971.
- [4] C. Lu, Y. Duan, P. Li, Y. Lu, S. Xu, J. Zhang, Polychromatic tunable luminescence of Eu<sup>3+</sup> doped CsPbBr<sub>3</sub> quantum dot glass ceramic induced by mechanical crystallization. *Ceram. Int.* 48 (2022) 13826-13832.
- [5] P. Lu, L. Lin, Z. Li, Z. Feng, Y. Yang, J. Cai, Z. Wang, Z. Zheng, Highly sensitive temperature sensing of compound of CsPbBr<sub>3</sub> perovskite quantum dots and NaYF<sub>4</sub>:Ho<sup>3+</sup> nanoparticles. *Optik* 246 (2021) 167794.
- [6] X. Li, Y. Yu, J. Hong, Z. Feng, X. Guan, D. Chen, Z. Zheng, Optical temperature sensing of Eu<sup>3+</sup>-doped oxyhalide glasses containing CsPbBr<sub>3</sub> perovskite quantum dots. *J. Lumin.* 219 (2020) 116897.
- [7] L. Han, Y. Han, J. Wu, X. Zhang, Z. Wang, Y. Xu, Two-step in situ synthesis of CsPbX<sub>3</sub>@TS-1 zeolite (X = Cl, Br, I) nanocomposites for optical thermometric, latent fingerprints and anti-counterfeiting applications. *Mater. Chem. Front.* 5 (2021) 7843-7851.
- [8] Y. Zhang, L. Han, B. Li, Y. Xu, Improved stability of all-inorganic perovskite nanocrystals in hierarchical ZSM-5 zeolites for multimodal applications. *Chem. Eng. J* 437 (2022) 135290-135303.
- [9] J. Liu, X. Yue, Z. Wang, X. Zhang, Y. Xu, Coumarin 7 functionalized europium-based metal-organic-framework luminescent composites for dual-mode optical thermometry. *J. Mater. Chem. C* 8 (2020) 13328-13335.
- [10] M. Becuwe, P. Rouge, C. Gervais, M. Courty, A. Dassonville-Klimpt, P. Sonnet, E. Baudrin, A new sensitive organic/inorganic hybrid material based on titanium oxide for the

---

potentiometric detection of Iron (III). *J. Colloid Interf. Sci.* 388 (2012) 130-136.

[11] Q. An, Q. Lin, X. Huang, R. Zhou, X. Guo, W. Xu, S. Wang, D. Xu, H-T Chang, Electrochemical synthesis of carbon dots with a Stokes shift of 309 nm for sensing of Fe<sup>3+</sup> and ascorbic acid. *Dyes Pigments* 185 (2021) 108878-108886.

[12] S. Bothra, J.N. Solanki, S.K. Sahoo, J.F. Callan, Anion-driven selective colorimetric detection of Hg<sup>2+</sup> and Fe<sup>3+</sup> using functionalized silver nanoparticles. *RSC Adv.* 4 (2014) 1341-1346.

[13] A. Xing, X. Miao, T. Liu, H. Yang, Y. Meng, X. Li, An intrinsic white-light-emitting hyperbranched polyimide: synthesis, structure-property and its application as a “turn-off” sensor for iron (III) ions. *J. Mater. Chem. C* 7 (2019) 14320-14333.

[14] Y. Zhang, X. Yang, Y. Pu, W. Cheng, S. Lin, Z. Shao, X. Laio, Selective, sensitive and label-free detection of Fe<sup>3+</sup> Ion in tap water using highly fluorescent graphene quantum dots. *J. Fluoresc.* 29 (2019) 541-548.

[15] X-H. Tan, G-B. Huang, Z-X. Cai, F-M. Li, Y-M. Zhou, M-S. Zhang, Monodisperse spherical sandwiched structured SiO<sub>2</sub>@CsPbX<sub>3</sub>@SiO<sub>2</sub> perovskite composites for the determination of Fe<sup>3+</sup> ion in water samples. *J. Anal. Test* 5 (2021) 40-50.

[16] D. G, Y. Zhang, B. Lyu, X. Guo, Y. Hou, J. Ma, B. Yu, S. Chen, Encapsulation of Pb-free CsSnCl<sub>3</sub> perovskite nanocrystals with bone gelatin: Enhanced stability and application in Fe<sup>3+</sup> sensing. *Inorg. Chem.* 61 (2022) 6547-6554.
